# Supplementary material for: Between Restrictive and Supportive Devices in the Context of Physical Restraints: Findings from a Large Mixed-Method Study Design
Source: MDPI journal article supplement (doi:10.3390/ijerph182312764), 2021-12-03
Supplement: s1 [file s1]

**Table S1. Good Reporting of A Mixed-Methods Study (GRAMMS) [32].**

| <b>Criteria</b>                                                                                 | <b>Page</b> |
|-------------------------------------------------------------------------------------------------|-------------|
| (1) Describe the justification for using a mixed methods approach to the research question      | 3           |
| (2) Describe the design in terms of the purpose, priority and sequence of methods               | 3           |
| (3) Describe each method in terms of sampling, data collection and analysis                     | 3-6         |
| (4) Describe where integration has occurred, how it has occurred and who has participated in it | 3 and 5-6   |
| (5) Describe any limitation of one method associated with the present of the other method       | 13-14       |
| (6) Describe any insights gained from mixing or integrating methods                             | 6-14        |
